# Supplementary material
Source: MDPI journal article supplement (https://www.mdpi.com/2072-4292/14/7/1647)
Supplement: s1 [file s1]

## Article

# Detection of Grassland Mowing Events for Germany by Combining Sentinel-1 and Sentinel-2 Time Series

Sophie Reinermann <sup>1,\*</sup>, Ursula Gessner <sup>2</sup>, Sarah Asam <sup>2</sup>, Tobias Ullmann <sup>3</sup>, Anne Schucknecht <sup>4</sup> and Claudia Kuenzer <sup>1,2</sup>

<sup>1</sup> Department of Remote Sensing, Institute of Geography and Geology, University of Würzburg, 97074 Würzburg, Germany; claudia.kuenzer@dlr.de

<sup>2</sup> German Remote Sensing Data Center (DFD), Earth Observation Center (EOC), German Aerospace Center (DLR), 82234 Wessling, Germany; ursula.gessner@dlr.de (U.G.); sarah.asam@dlr.de (S.A.)

<sup>3</sup> Department of Physical Geography, Institute of Geography and Geology, University of Würzburg, 97074 Würzburg, Germany; tobias.ullmann@uni-wuerzburg.de

<sup>4</sup> Karlsruhe Institute of Technology (KIT), Institute of Meteorology and Climate Research—Atmospheric Environmental Research, 82467 Garmisch-Partenkirchen, Germany; anne.schucknecht@kit.edu

\* Correspondence: sophie.reinermann@dlr.de

## Supplementary Material

**Table S1.** Description of the three exemplary plots for which annual time series of S2 and S1 parameters are shown while investigating their potential to detect mowing events (Figure 3).

|                                                   | A                                                                                   | B                                                                                    | C                                                                                     |
|---------------------------------------------------|-------------------------------------------------------------------------------------|--------------------------------------------------------------------------------------|---------------------------------------------------------------------------------------|
| Site                                              | RB-L                                                                                | FE4                                                                                  | UGAU                                                                                  |
| Altitude [m a.s.l.]                               | 771                                                                                 | 597                                                                                  | 831                                                                                   |
| Annual precipitation in 2019 [mm] <sup>1</sup>    | 1315                                                                                | 967                                                                                  | 1499                                                                                  |
| Annual mean temperature in 2019 [°C] <sup>1</sup> | 9.04                                                                                | 9.11                                                                                 | 7.02                                                                                  |
| Mowing frequency in 2019                          | 5                                                                                   | 4                                                                                    | 3                                                                                     |
| Camera image example <sup>1</sup>                 |  |  |  |

<sup>1</sup> Mean annual climate parameters derived from the TERENO pre-Alpine observatory [38]. Sources of camera images: A and B are from the TERENO observatory [38] and C is from [www.foto-webcam.eu/webcam/unterammergau](http://www.foto-webcam.eu/webcam/unterammergau).

**Table S2.** List of websites with webcams from which mowing information was continuously collected. The websites were visited and the RGB information was collected by using a cronjob on a Linux machine every day. As a consequence, there were daily images available as reference data.

| Webcam Name     | Website                                                                         |
|-----------------|---------------------------------------------------------------------------------|
| Aschau-Fellerer | <a href="https://www.terra-hd.de/aschau1/">https://www.terra-hd.de/aschau1/</a> |

|                             |                                                                                                                                                   |
|-----------------------------|---------------------------------------------------------------------------------------------------------------------------------------------------|
| Aschau-Cafe Pauli           | <a href="https://www.terra-hd.de/aschau4/">https://www.terra-hd.de/aschau4/</a>                                                                   |
| Bernau-Bergham              | <a href="https://www.terra-hd.de/bernaul/">https://www.terra-hd.de/bernaul/</a>                                                                   |
| Bernau-Hittenkirchen        | <a href="https://www.terra-hd.de/bernaul2/">https://www.terra-hd.de/bernaul2/</a>                                                                 |
| Bielefeld-Hünenburg         | <a href="http://hamnet-bielefeld.de/webcam/bielefeld/">http://hamnet-bielefeld.de/webcam/bielefeld/</a>                                           |
| Burghausen                  | <a href="https://www.foto-webcam.net/webcam/burghausen2">https://www.foto-webcam.net/webcam/burghausen2</a>                                       |
| Oppenau-                    | <a href="https://www.foto-webcam.eu/webcam/buchkopfturm">https://www.foto-webcam.eu/webcam/buchkopfturm</a>                                       |
| MaisachBuchkopfturm         | <a href="https://www.foto-webcam.eu/webcam/schareben/2018/09/03/1630">www.foto-webcam.eu/webcam/schareben/2018/09/03/1630</a>                     |
| Drachselsried               | <a href="https://www.terra-hd.de/erlstaett/">https://www.terra-hd.de/erlstaett/</a>                                                               |
| Erlstätt                    | <a href="http://www.sauerland.camera/webcam/erndtebrueck/">http://www.sauerland.camera/webcam/erndtebrueck/</a>                                   |
| Erndtebrück                 | <a href="https://www.foto-webcam.eu/webcam/ettelsberg/">https://www.foto-webcam.eu/webcam/ettelsberg/</a>                                         |
| Ettelsberg                  | <a href="https://webcams.preyer.net/webcam/alex1">https://webcams.preyer.net/webcam/alex1</a>                                                     |
| Hammelburg-NW               | <a href="https://webcams.preyer.net/webcam/alex2">https://webcams.preyer.net/webcam/alex2</a>                                                     |
| Hammelburg-NO               | <a href="https://www.terra-hd.de/hochwald2/">https://www.terra-hd.de/hochwald2/</a>                                                               |
| Görlitz-Hochwaldturm        | <a href="https://www.terra-hd.de/hochwald3/">https://www.terra-hd.de/hochwald3/</a>                                                               |
| Görlitz-HochwaldOst         | <a href="https://www.terra-hd.de/krompach/">https://www.terra-hd.de/krompach/</a>                                                                 |
| Krompach                    | <a href="https://www.foto-webcam.eu/webcam/oberstauften/">www.foto-webcam.eu/webcam/oberstauften/</a>                                             |
| Oberstauften                | <a href="https://www.reisen-und-hobby.de/webcam-radevormwald/">https://www.reisen-und-hobby.de/webcam-radevormwald/</a>                           |
| Radevormwald                | <a href="https://www.terra-hd.de/reute/">https://www.terra-hd.de/reute/</a>                                                                       |
| Reute-Breisgau              | <a href="https://www.terra-hd.de/rottau/">https://www.terra-hd.de/rottau/</a>                                                                     |
| Rottau                      | <a href="https://www.terra-hd.de/ruhpolding/">https://www.terra-hd.de/ruhpolding/</a>                                                             |
| Ruhpolding-Eggerschneid     | <a href="https://www.terra-hd.de/pullach/">https://www.terra-hd.de/pullach/</a>                                                                   |
| Sebruck-Alz                 | <a href="https://www.terra-hd.de/staffn/">https://www.terra-hd.de/staffn/</a>                                                                     |
| Staffn                      | <a href="https://www.terra-hd.de/wimpasing/">https://www.terra-hd.de/wimpasing/</a>                                                               |
| Vachendorf-Wimpasing        | <a href="https://www.foto-webcam.eu/webcam/herzogstand">www.foto-webcam.eu/webcam/herzogstand</a>                                                 |
| Herzogstand_sued            | <a href="https://www.foto-webcam.eu/webcam/tegelberg">www.foto-webcam.eu/webcam/tegelberg</a>                                                     |
| Tegelberghaus               | <a href="https://www.foto-webcam.eu/webcam/peissenberg">www.foto-webcam.eu/webcam/peissenberg</a>                                                 |
| Hohenpeissenberg            | <a href="https://www.foto-webcam.eu/webcam/unterammergau/1200.jpg">www.foto-webcam.eu/webcam/unterammergau/1200.jpg</a>                           |
| Unterammergau               | <a href="https://www.foto-webcam.org/webcam/dietramszell">www.foto-webcam.org/webcam/dietramszell</a>                                             |
| Dietramszell                | <a href="https://www.foto-webcam.org/webcam/dietramszell">http://oberammergauer-land.com/webcams/ogau/current1.jpg</a>                            |
| Oberammergau                | <a href="https://www.gemeinde-ettal.de/webcam/current1.jpg">www.gemeinde-ettal.de/webcam/current1.jpg</a>                                         |
| Oberammergau_Ettal          | <a href="https://www.halblech.allgaeu-cam.de/webcam/halblech-webcam.jpg">http://halblech.allgaeu-cam.de/webcam/halblech-webcam.jpg</a>            |
| Halblech                    | <a href="https://wertach.it-wms.com">https://wertach.it-wms.com</a>                                                                               |
| Allgaeuhaus_Wertach         | <a href="https://dietrich-edv-service.de/webcam/oberellegg_webcam.jpg">https://dietrich-edv-service.de/webcam/oberellegg_webcam.jpg</a>           |
| Oberellegg_Wertach          | <a href="https://www.webcam.jachenau-webcam.info">http://webcam.jachenau-webcam.info</a>                                                          |
| Gasthof_Jachenau            | <a href="https://luitpoldbad.de/website/var/assets/webcam">https://luitpoldbad.de/website/var/assets/webcam</a>                                   |
| BadHindelang_HotelPrinzLBad | <a href="https://wtvhspt.feratel.com/hotspot/35/3028/3.jpeg">https://wtvhspt.feratel.com/hotspot/35/3028/3.jpeg</a>                               |
| Schloss_Hohenschwangau_01   | <a href="https://www.webcam.stoegerhof.de/stoegerhof1280.jpg">http://webcam.stoegerhof.de/stoegerhof1280.jpg</a>                                  |
| Rieden                      | <a href="https://www.wellness-heaven.com/webcam/starnberg">www.wellness-heaven.com/webcam/starnberg</a>                                           |
| Starnberg                   | <a href="https://www.bayernwebcam.de/bilder/kreutalm.jpg">www.bayernwebcam.de/bilder/kreutalm.jpg</a>                                             |
| Kreutalm                    | <a href="https://kinker.it-wms.com/big_current1.jpg">http://kinker.it-wms.com/big_current1.jpg</a>                                                |
| Kinker                      | <a href="https://www.rosshaupten.de/webcam/webcam.jpg">www.rosshaupten.de/webcam/webcam.jpg</a>                                                   |
| Rosshaupten                 | <a href="https://www.foto-webcam.eu/webcam/kochelsee">www.foto-webcam.eu/webcam/kochelsee</a>                                                     |
| Kochelsee                   | <a href="https://www.tourispo.ch/schloss-burg/schloss-ahrensburg/webcam">www.tourispo.ch/schloss-burg/schloss-ahrensburg/webcam</a>               |
| Delingsdorf                 | <a href="https://www.tourispo.ch/radtour/langeoog--meierei/webcam">www.tourispo.ch/radtour/langeoog--meierei/webcam</a>                           |
| Spiekerroog                 | <a href="https://www.tourispo.de/attraktion/titan-rt-haengebruecke-harz/webcam">www.tourispo.de/attraktion/titan-rt-haengebruecke-harz/webcam</a> |
| Braunlage                   | <a href="https://www.tourispo.ch/schloss-burg/festung-koenigstein/webcam">www.tourispo.ch/schloss-burg/festung-koenigstein/webcam</a>             |
| Bad Schandau                |                                                                                                                                                   |

|                            |                                                                                                                                                                                                                                                     |
|----------------------------|-----------------------------------------------------------------------------------------------------------------------------------------------------------------------------------------------------------------------------------------------------|
| Rehefeld Zaunhaus          | <a href="http://www.tourispo.ch/wanderung/drei-berge-tour-kahleberg-geisingberg-kohlhaukuppe/webcam">www.tourispo.ch/wanderung/drei-berge-tour-kahleberg-geisingberg-kohlhaukuppe/webcam</a>                                                        |
| Oberbärenburg              | <a href="http://www.tourispo.ch/wanderung/drei-berge-tour-kahleberg-geisingberg-kohlhaukuppe/webcam">www.tourispo.ch/wanderung/drei-berge-tour-kahleberg-geisingberg-kohlhaukuppe/webcam</a>                                                        |
| Bleißberg                  | <a href="http://www.tourispo.ch/schloss-burg/veste-heldburg-deutsches-burgenmuseum/webcam">www.tourispo.ch/schloss-burg/veste-heldburg-deutsches-burgenmuseum/webcam</a>                                                                            |
| Friedrichroda              | <a href="http://www.skigebiete-test.de/webcam">www.skigebiete-test.de/webcam</a>                                                                                                                                                                    |
| Willingen                  | <a href="http://www.tourispo.ch/sehenswuerdigkeit/bruchhauser-steine-sauerland/webcam">www.tourispo.ch/sehenswuerdigkeit/bruchhauser-steine-sauerland/webcam</a>                                                                                    |
| Hornbad-Meinberg           | <a href="http://www.tourispo.ch/sehenswuerdigkeit/externsteine-im-teutoburger-wald/webcam">www.tourispo.ch/sehenswuerdigkeit/externsteine-im-teutoburger-wald/webcam</a>                                                                            |
| Fürstenhausen              | <a href="http://www.tourispo.de/museum/deutsches-zeitungsmuseum-wadgassen/webcam">www.tourispo.de/museum/deutsches-zeitungsmuseum-wadgassen/webcam</a>                                                                                              |
| Hochschwarzwald            | <a href="http://www.tourispo.ch/wanderung/auf-dem-westweg-vom-thurner-nach-titisee/webcam">www.tourispo.ch/wanderung/auf-dem-westweg-vom-thurner-nach-titisee/webcam</a>                                                                            |
| Breitnau                   | <a href="http://www.tourispo.ch/wanderung/auf-dem-westweg-vom-thurner-nach-titisee/webcam">www.tourispo.ch/wanderung/auf-dem-westweg-vom-thurner-nach-titisee/webcam</a>                                                                            |
| Niederstotzingen           | <a href="http://www.tourispo.ch/wanderung/albschaeferweg/webcam">www.tourispo.ch/wanderung/albschaeferweg/webcam</a>                                                                                                                                |
| Seeg                       | <a href="http://www.tourispo.ch/wanderung/wandertrilogie-allgaeu-wiesengaenger-route/webcam">www.tourispo.ch/wanderung/wandertrilogie-allgaeu-wiesengaenger-route/webcam</a>                                                                        |
| Oberreute                  | <a href="http://www.skigebiete-test.de/langlauf/hochstraesslifte-oberreute/webcam">www.skigebiete-test.de/langlauf/hochstraesslifte-oberreute/webcam</a>                                                                                            |
| Elisabethszell1            | <a href="http://webcam.deg.net/?a=showcam&amp;w=showarchivimage&amp;o=elz1&amp;id=201903251015">http://webcam.deg.net/?a=showcam&amp;w=showarchivimage&amp;o=elz1&amp;id=201903251015</a>                                                           |
| Elisabethszell2            | <a href="http://webcam.deg.net/?a=showcam&amp;w=showarchivimage&amp;o=elz2&amp;id=201907251045">http://webcam.deg.net/?a=showcam&amp;w=showarchivimage&amp;o=elz2&amp;id=201907251045</a>                                                           |
| Oberstdorf                 | <a href="http://www.foto-webcam.eu/webcam/scheibenhau/2019/09/30/1520">www.foto-webcam.eu/webcam/scheibenhau/2019/09/30/1520</a>                                                                                                                    |
| Wendelstein                | <a href="http://www.foto-webcam.eu/webcam/wendelstein-west/2020/04/23/1130">www.foto-webcam.eu/webcam/wendelstein-west/2020/04/23/1130</a>                                                                                                          |
| Ramsau bei Berchtesgaden   | <a href="http://www.foto-webcam.eu/webcam/vorderloiplsau/2021/03/30/1130">www.foto-webcam.eu/webcam/vorderloiplsau/2021/03/30/1130</a>                                                                                                              |
| Langewiese                 | <a href="https://sauerland.camera/beta/?site=webcam&amp;cam=langewiese">https://sauerland.camera/beta/?site=webcam&amp;cam=langewiese</a>                                                                                                           |
| Alme                       | <a href="https://sauerland.camera/beta/?site=webcam&amp;cam=alme">https://sauerland.camera/beta/?site=webcam&amp;cam=alme</a>                                                                                                                       |
| Altastenberg               | <a href="https://sauerland.camera/beta/?site=webcam&amp;cam=altastenberg">https://sauerland.camera/beta/?site=webcam&amp;cam=altastenberg</a>                                                                                                       |
| Schmallenberg_Grafschaft_2 | <a href="https://sauerland.camera/beta/?site=webcam&amp;cam=grafschaft2&amp;year=2020&amp;month=05&amp;day=09&amp;time=1430">https://sauerland.camera/beta/?site=webcam&amp;cam=grafschaft2&amp;year=2020&amp;month=05&amp;day=09&amp;time=1430</a> |
| Olsberg_Eisenberg          | <a href="https://sauerland.camera/beta/?site=webcam&amp;cam=schinkenwirt">https://sauerland.camera/beta/?site=webcam&amp;cam=schinkenwirt</a>                                                                                                       |

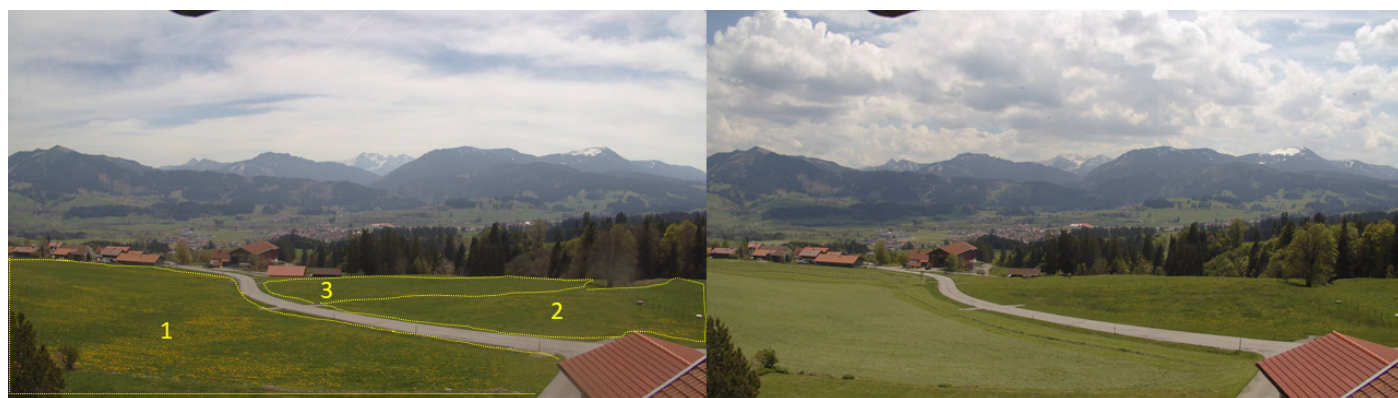

**Figure S3.** Example of public webcam showing three grassland parcels (1, 2, 3) taken on 21.4. (left) and 24.5. (right). Parcel 1 was recently mown in the picture on the right.

**Table S4.** Additional information of the 13 calibration sites, which were investigated to select the most suitable variables, develop the rule-set and define the thresholds for the mowing event detection approach.

|                                                                                                                                            |                                                                                                                                            |                                                                                                                                              |
|--------------------------------------------------------------------------------------------------------------------------------------------|--------------------------------------------------------------------------------------------------------------------------------------------|----------------------------------------------------------------------------------------------------------------------------------------------|
| <p><b>RB-L</b></p>  <p>Mown: 5 times<br/>Grazing: no</p>  | <p><b>FE4</b></p>  <p>Mown: 4 times<br/>Grazing: no</p>  | <p><b>UGAU</b></p>  <p>Mown: 3 times<br/>Grazing: yes</p> |
| <p><b>GL</b></p>  <p>Mown: 6 times<br/>Grazing: no</p>    | <p><b>MN</b></p>  <p>Mown: 4 times<br/>Grazing: no</p>   | <p><b>HF</b></p>  <p>Mown: 1 time<br/>Grazing: yes</p>    |
| <p><b>RB1</b></p>  <p>Mown: 5 times<br/>Grazing: no</p>  | <p><b>FE1</b></p>  <p>Mown: 4 times<br/>Grazing: no</p> | <p><b>FE3</b></p>  <p>Mown: 1 time<br/>Grazing: yes</p>  |
| <p><b>FE2</b></p>  <p>Mown: 5 times<br/>Grazing: no</p> | <p><b>MW</b></p>  <p>Mown: 3 times<br/>Grazing: no</p> | <p><b>RB2</b></p>  <p>Mown: 1 time<br/>Grazing: no</p>  |
| <p><b>UF</b></p>  <p>Mown: 3 times<br/>Grazing: no</p>  |                                                                                                                                            |                                                                                                                                              |

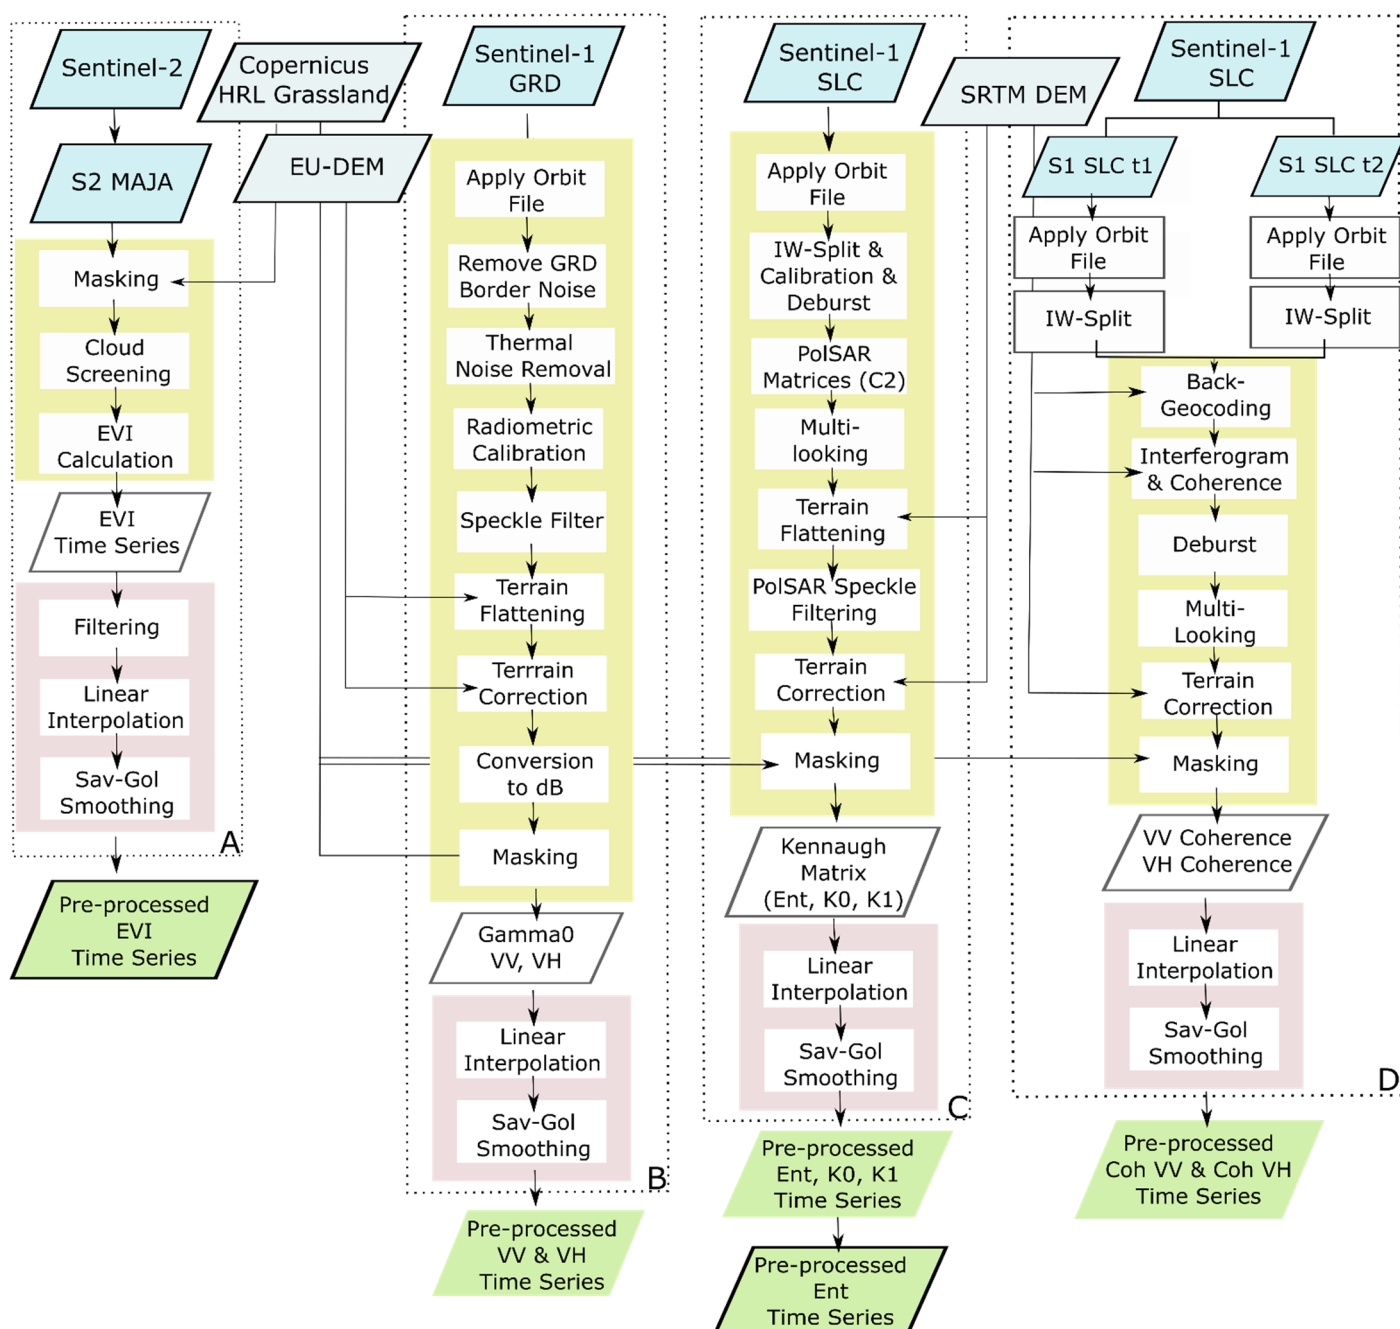

**Figure S5.** Pre-processing steps of the Sentinel-2 and Sentinel-1 parameters.



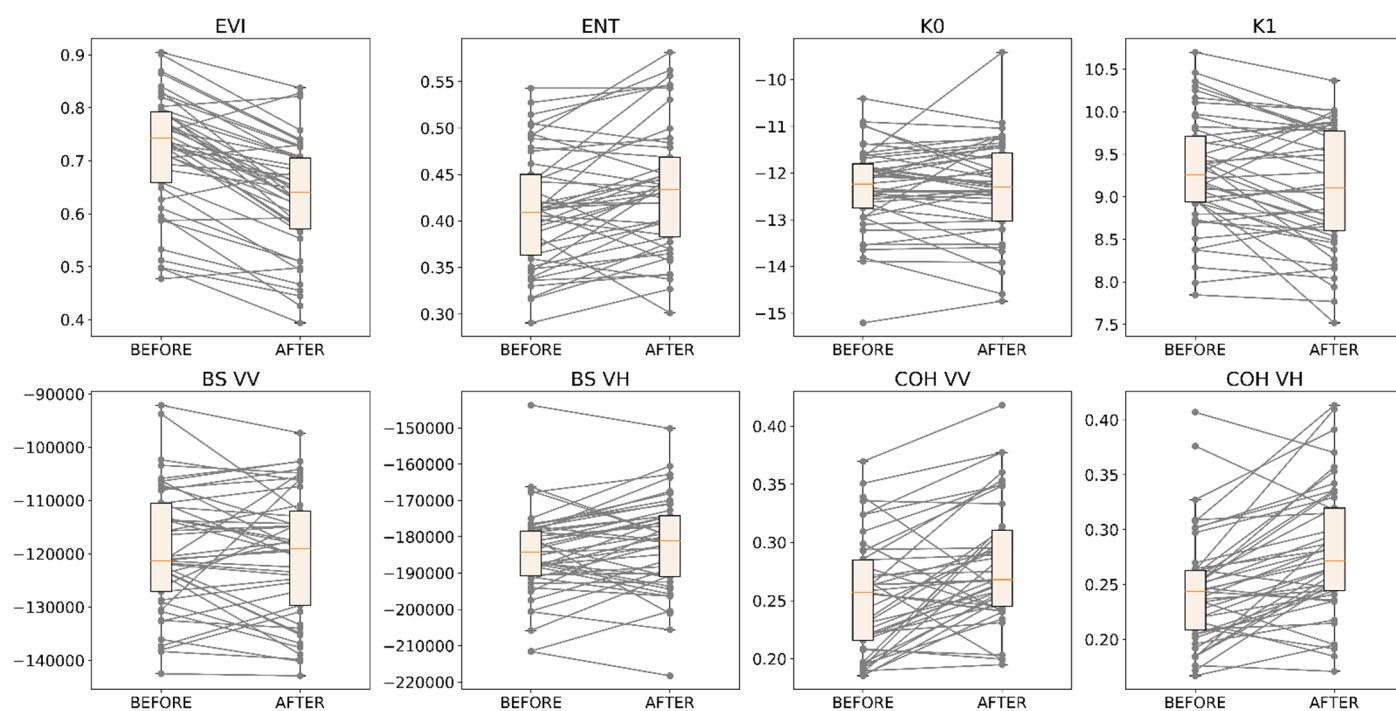

**Figure S6.** Comparison of values combined for six days before and six days after each mowing event of the calibration dataset ( $n(\text{mowing events})=45$ ) for all investigated parameters, including all single data points.
